# Supplementary material
Source: PubMed Central journal article supplement (PMC4863222)
Supplement: aasm.39.6.1321s1.pdf [file aasm.39.6.1321s1.pdf]

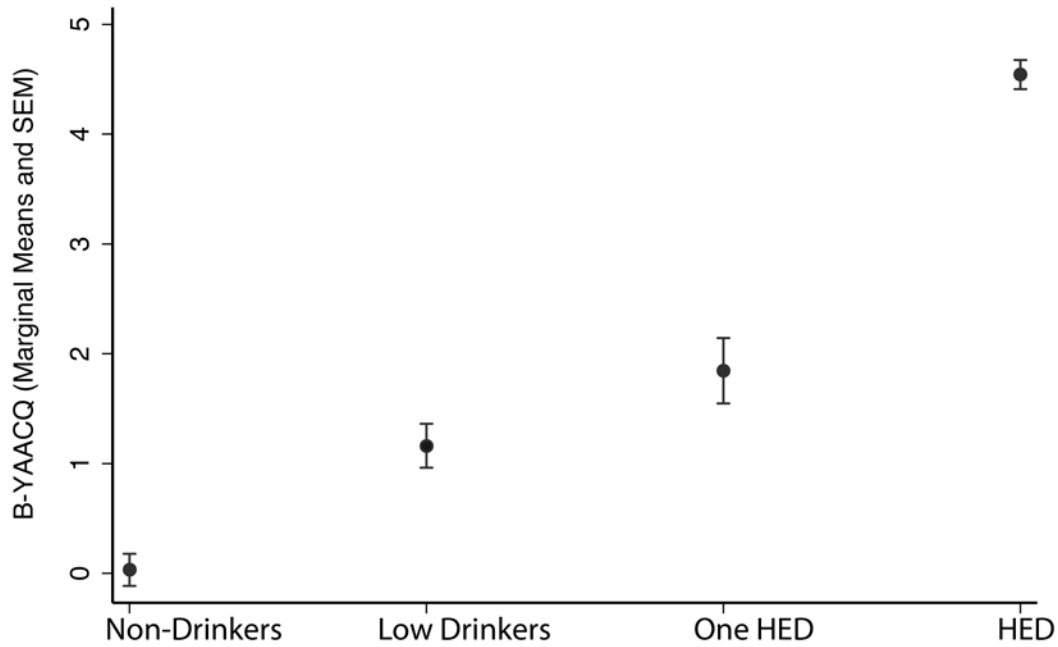

**Figure S1**—Total number of drinks consumed across diary period, mean number of drinks on drinking days, and B-YAACQ for four alcohol groups (nondrinkers, drinkers with no HED, drinkers with no more than 1 HED, and HED). Based on these data we collapsed the drinkers with no HED and drinkers with no more than 1 HED for the analyses in this paper. B-YAACQ = Brief-Young Adult Alcohol Consequences Questionnaire; HED = heavy episodic drinking.

**Table S1**—F-statistics, P-values, and effect sizes for analyses of variance examining nondrinkers, drinkers, and high school-/heavy episodic drinkers.

| Sleep Variables                          | Main effect of alcohol group |             |                  | Main effect of sex  |             |                  |
|------------------------------------------|------------------------------|-------------|------------------|---------------------|-------------|------------------|
|                                          | F-statistic                  | P value     | Eta <sup>2</sup> | F-statistic         | P value     | Eta <sup>2</sup> |
| Rise time (clock time, min)              | $F_{1,641} = 7.78$           | $P < 0.001$ | 0.024            | $F_{1,641} = 25.09$ | $P < 0.001$ | 0.038            |
| Variability (SD) in rise time (min)      | $F_{1,641} = 1.95$           | $P = 0.14$  | 0.006            | $F_{1,641} = 29.15$ | $P < 0.001$ | 0.044            |
| Bedtime (clock time, min)                | $F_{1,641} = 5.07$           | $P = 0.007$ | 0.016            | $F_{1,641} = 10.04$ | $P = 0.002$ | 0.015            |
| Variability (SD) in bedtime (min)        | $F_{1,641} = 1.68$           | $P = 0.19$  | 0.005            | $F_{1,641} = 3.25$  | $P = 0.07$  | 0.005            |
| Total sleep time (h)                     | $F_{1,641} = 0.27$           | $P = 0.76$  | 0.001            | $F_{1,641} = 2.04$  | $P = 0.15$  | 0.003            |
| Variability (SD) in total sleep time (h) | $F_{1,641} = 0.82$           | $P = 0.44$  | 0.003            | $F_{1,641} = 3.99$  | $P = 0.05$  | 0.006            |

SD = standard deviation.
